# Supplementary material
Source: Springer Nature journal article supplement (https://www.springermedizin.de/resource/supplementary/12958_2013_1146_MOESM2_ESM.pdf/9566882)

**A**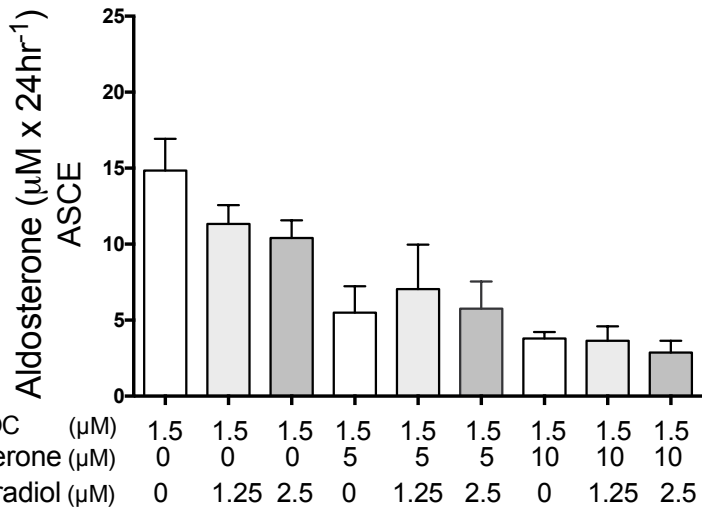**B**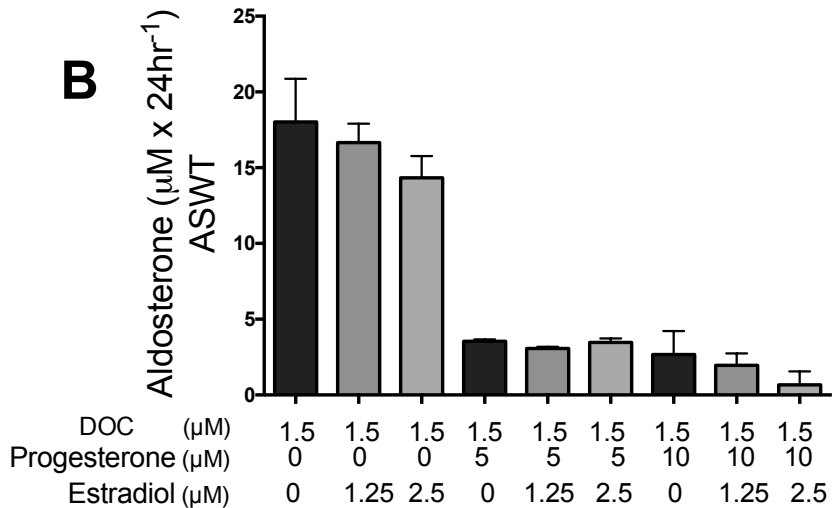

Supplement: MOESM2 [file 9566882]
